# Supplementary material
Source: PubMed Central journal article supplement (PMC6885538)
Supplement: NIHMS1537852-supplement-2.pdf [file NIHMS1537852-supplement-2.pdf]

# Figure S2

vertebrate\_P1.Homo\_sapiens  
anura\_P2.Rana\_clamitans  
vertebrate\_P2.Taeniopygia\_guttata  
cephalochordata.Branchiostoma\_belcheri  
echinoderm.Strongylocentrotus\_purpuratus  
insect.Cryptocercus\_wrighti  
arachnida.Parasteatoda\_tepidariorum  
arachnida2.Ixodes\_scapularis  
arachnida3.Leptotrombidium\_deliense  
mollusca.Crassostrea\_gigas  
gastropodC.Arion\_vulgaris  
worms.Lineus\_longissimus  
cnidaria.Lucernaria\_quadricornis  
cnidaria2.Aurelia\_aurita

vertebrate\_P1.Homo\_sapiens  
anura\_P2.Rana\_clamitans  
vertebrate\_P2.Taeniopygia\_guttata  
cephalochordata.Branchiostoma\_belcheri  
echinoderm.Strongylocentrotus\_purpuratus  
insect.Cryptocercus\_wrighti  
arachnida.Parasteatoda\_tepidariorum  
arachnida2.Ixodes\_scapularis  
arachnida3.Leptotrombidium\_deliense  
mollusca.Crassostrea\_gigas  
gastropodC.Arion\_vulgaris  
worms.Lineus\_longissimus  
cnidaria.Lucernaria\_quadricornis  
cnidaria2.Aurelia\_aurita

vertebrate\_P1.Homo\_sapiens  
anura\_P2.Rana\_clamitans  
vertebrate\_P2.Taeniopygia\_guttata  
cephalochordata.Branchiostoma\_belcheri  
echinoderm.Strongylocentrotus\_purpuratus  
insect.Cryptocercus\_wrighti  
arachnida.Parasteatoda\_tepidariorum  
arachnida2.Ixodes\_scapularis  
arachnida3.Leptotrombidium\_deliense  
mollusca.Crassostrea\_gigas  
gastropodC.Arion\_vulgaris  
worms.Lineus\_longissimus  
cnidaria.Lucernaria\_quadricornis  
cnidaria2.Aurelia\_aurita

vertebrate\_P1.Homo\_sapiens  
anura\_P2.Rana\_clamitans  
vertebrate\_P2.Taeniopygia\_guttata  
cephalochordata.Branchiostoma\_belcheri  
echinoderm.Strongylocentrotus\_purpuratus  
insect.Cryptocercus\_wrighti  
arachnida.Parasteatoda\_tepidariorum  
arachnida2.Ixodes\_scapularis  
arachnida3.Leptotrombidium\_deliense  
mollusca.Crassostrea\_gigas  
gastropodC.Arion\_vulgaris  
worms.Lineus\_longissimus  
cnidaria.Lucernaria\_quadricornis  
cnidaria2.Aurelia\_aurita

vertebrate\_P1.Homo\_sapiens  
anura\_P2.Rana\_clamitans  
vertebrate\_P2.Taeniopygia\_guttata  
cephalochordata.Branchiostoma\_belcheri  
echinoderm.Strongylocentrotus\_purpuratus  
insect.Cryptocercus\_wrighti  
arachnida.Parasteatoda\_tepidariorum  
arachnida2.Ixodes\_scapularis  
arachnida3.Leptotrombidium\_deliense  
mollusca.Crassostrea\_gigas  
gastropodC.Arion\_vulgaris  
worms.Lineus\_longissimus  
cnidaria.Lucernaria\_quadricornis  
cnidaria2.Aurelia\_aurita
