# Supplementary material
Source: PubMed Central journal article supplement (PMC6885538)

**Figure S9**Groups:  se-supplemented  non-supplemented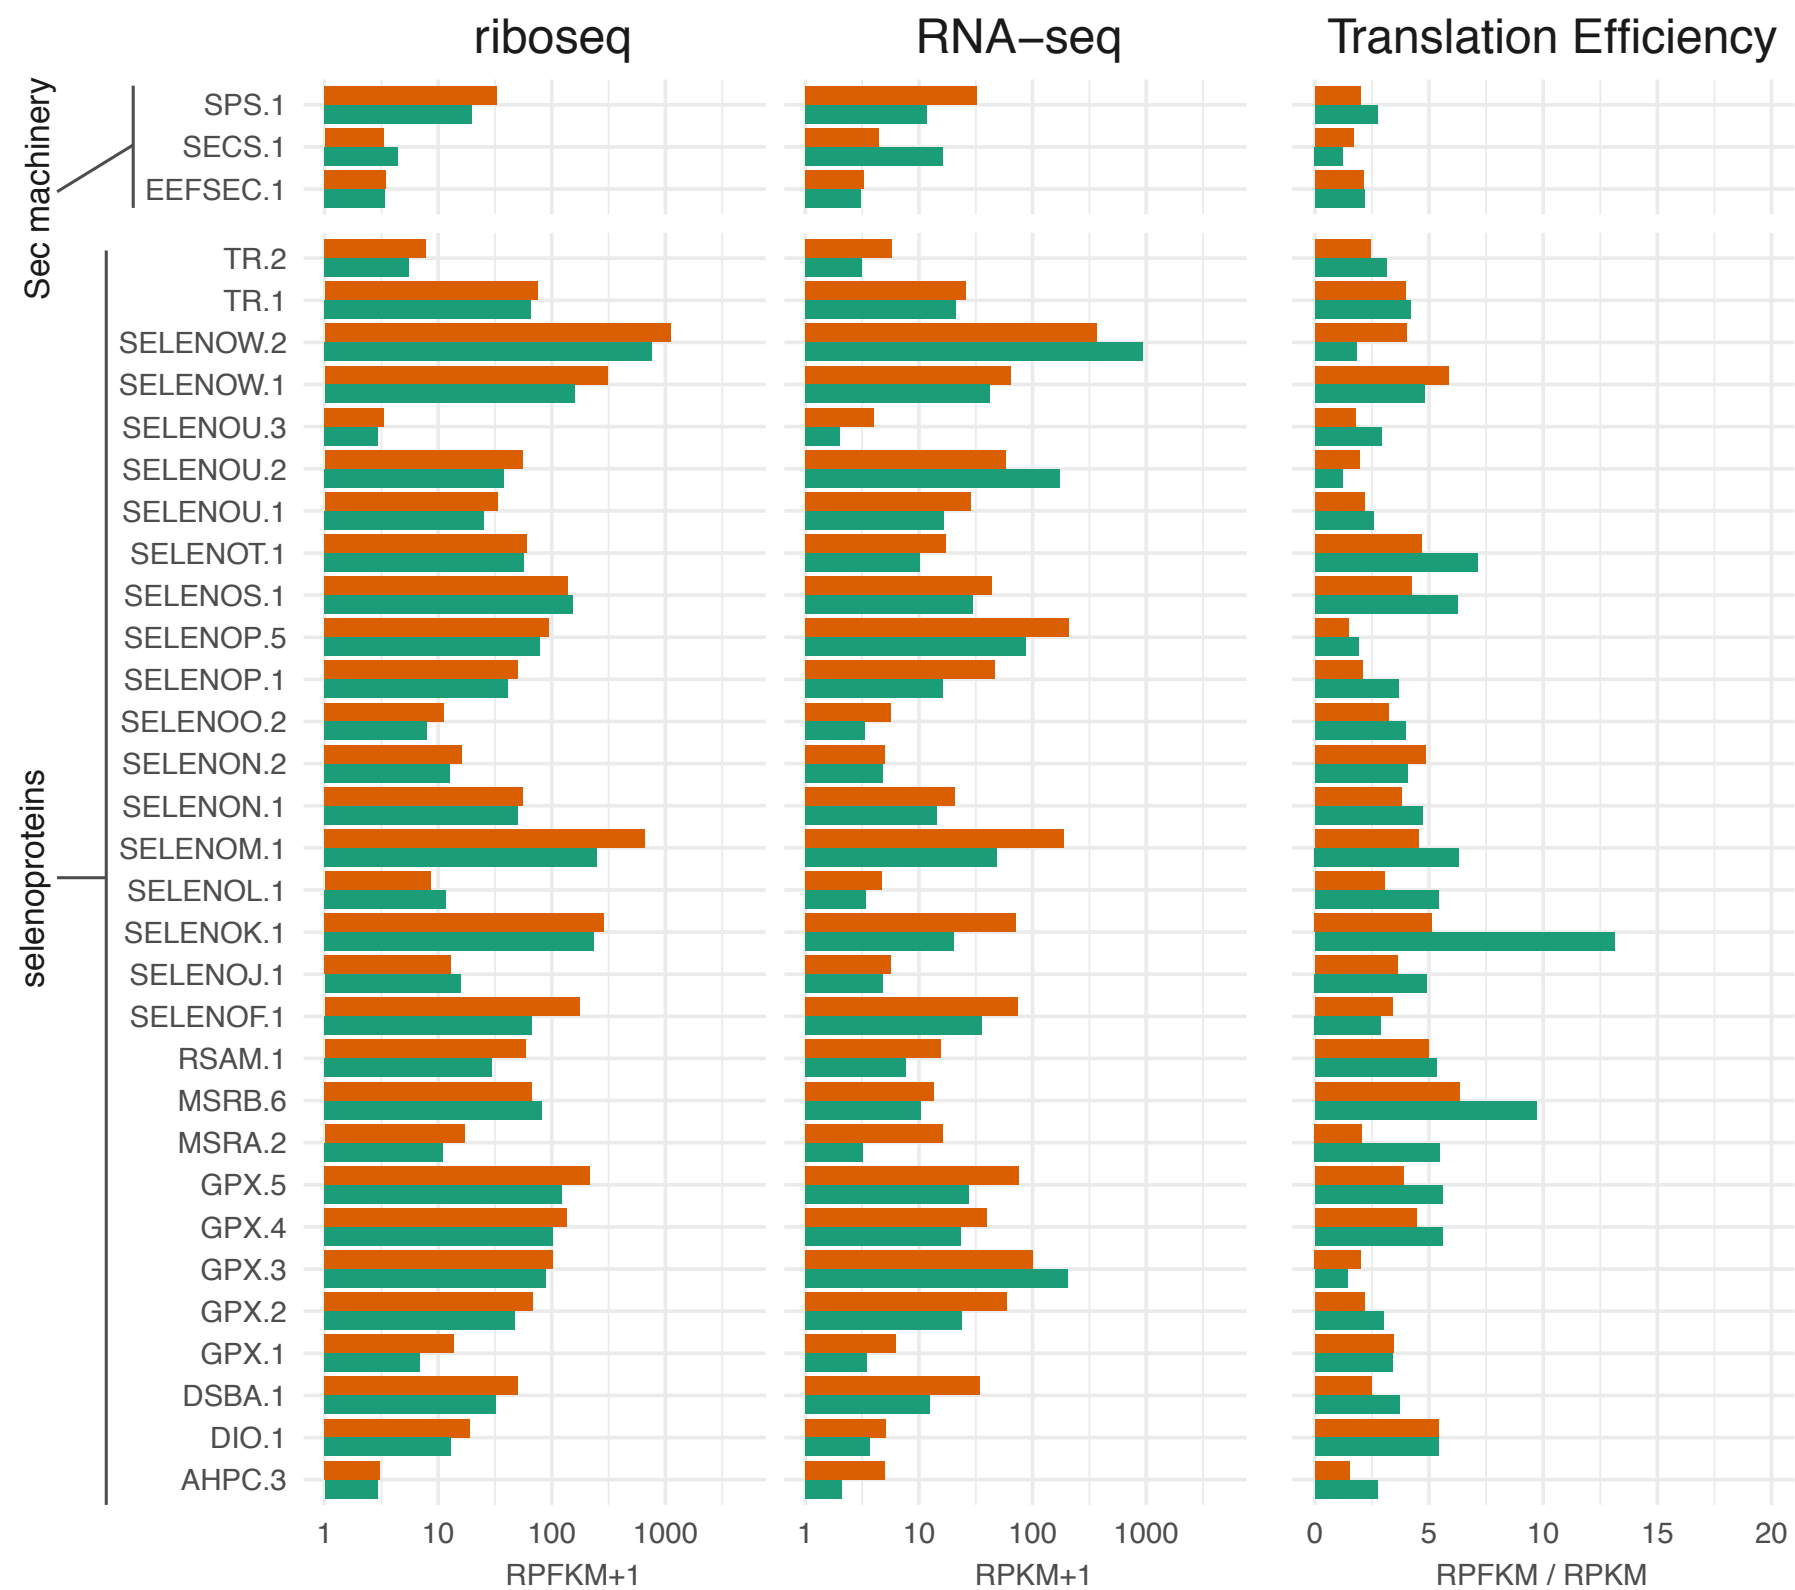

transcriptome

Sec machinery  
and selenoproteins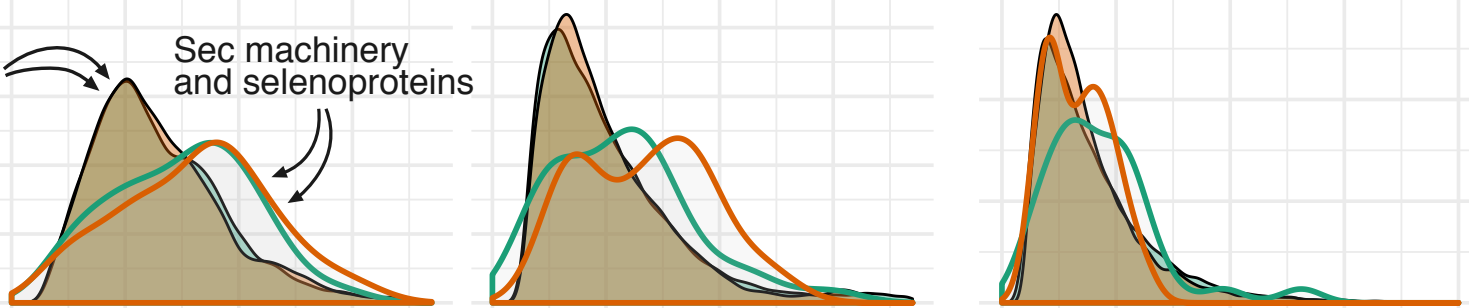

Supplement: NIHMS1537852-supplement-9.pdf [file NIHMS1537852-supplement-9.pdf]
