# Supplementary material
Source: PubMed Central journal article supplement (PMC6885538)

**Figure S10**

**A.**

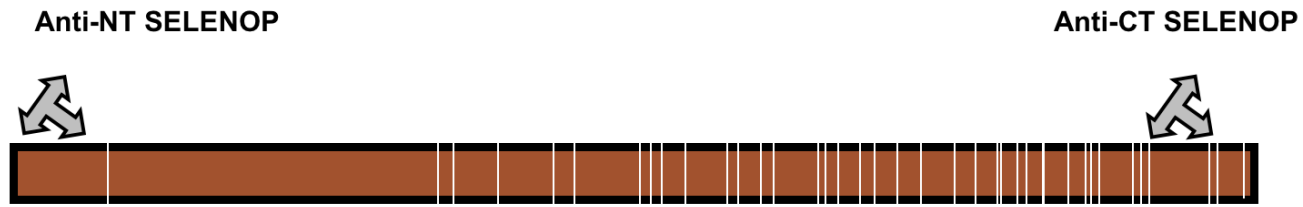

**B.**

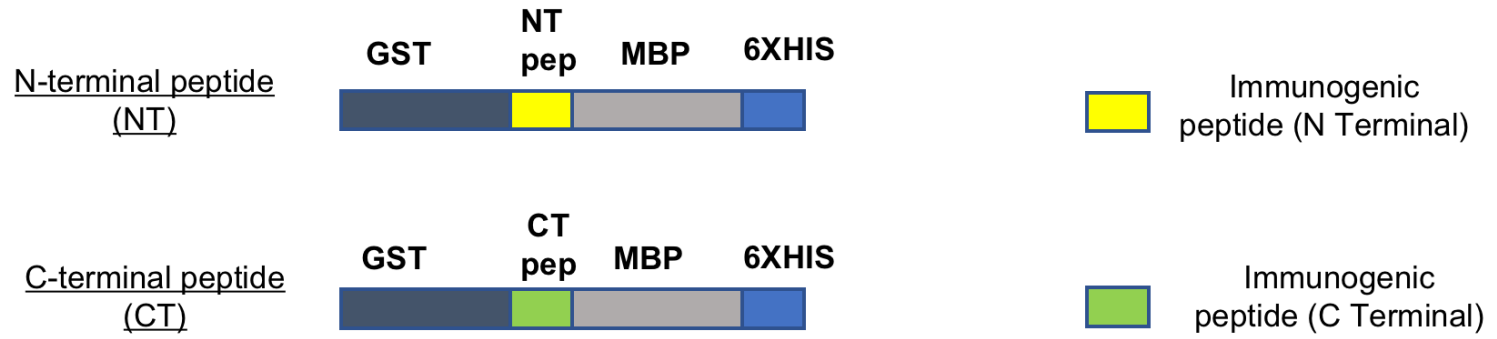

**C.**

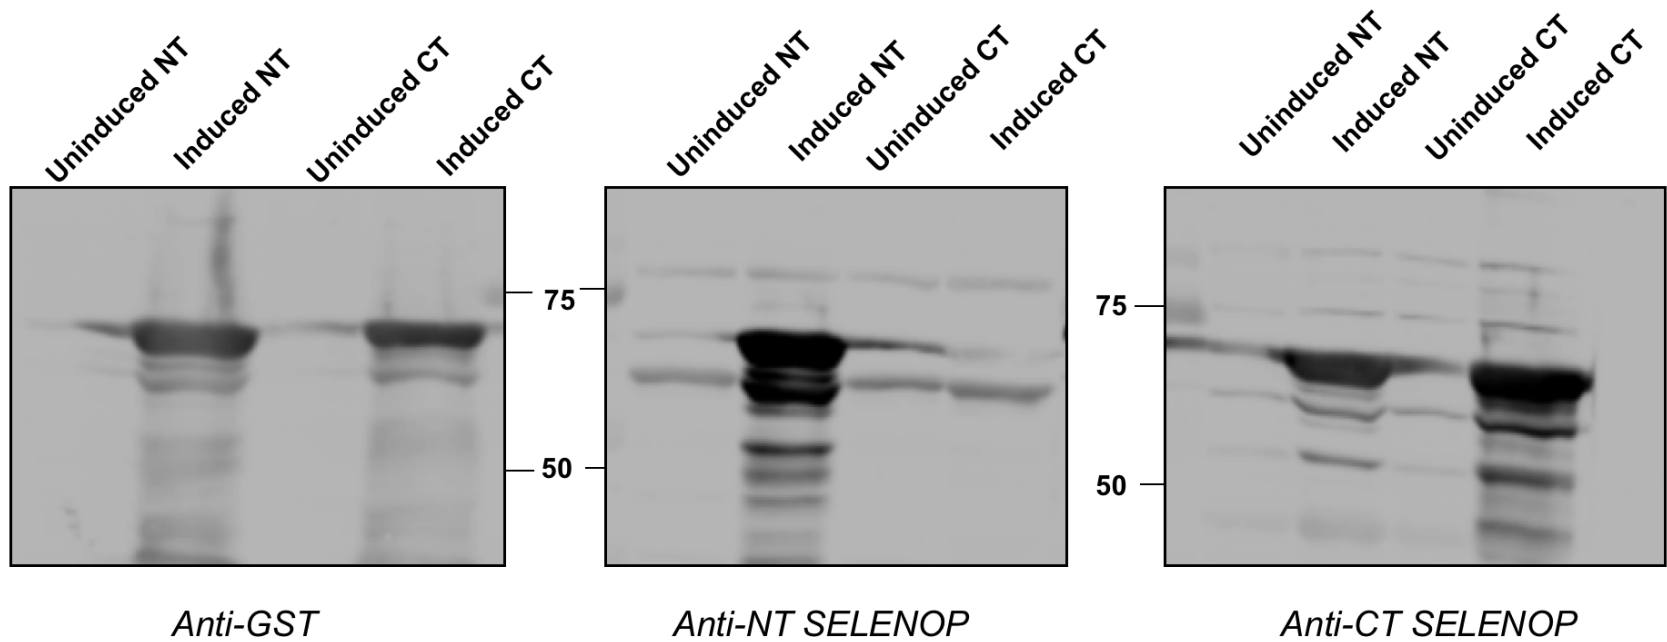

Supplement: NIHMS1537852-supplement-10.pdf [file NIHMS1537852-supplement-10.pdf]

# Figure S12

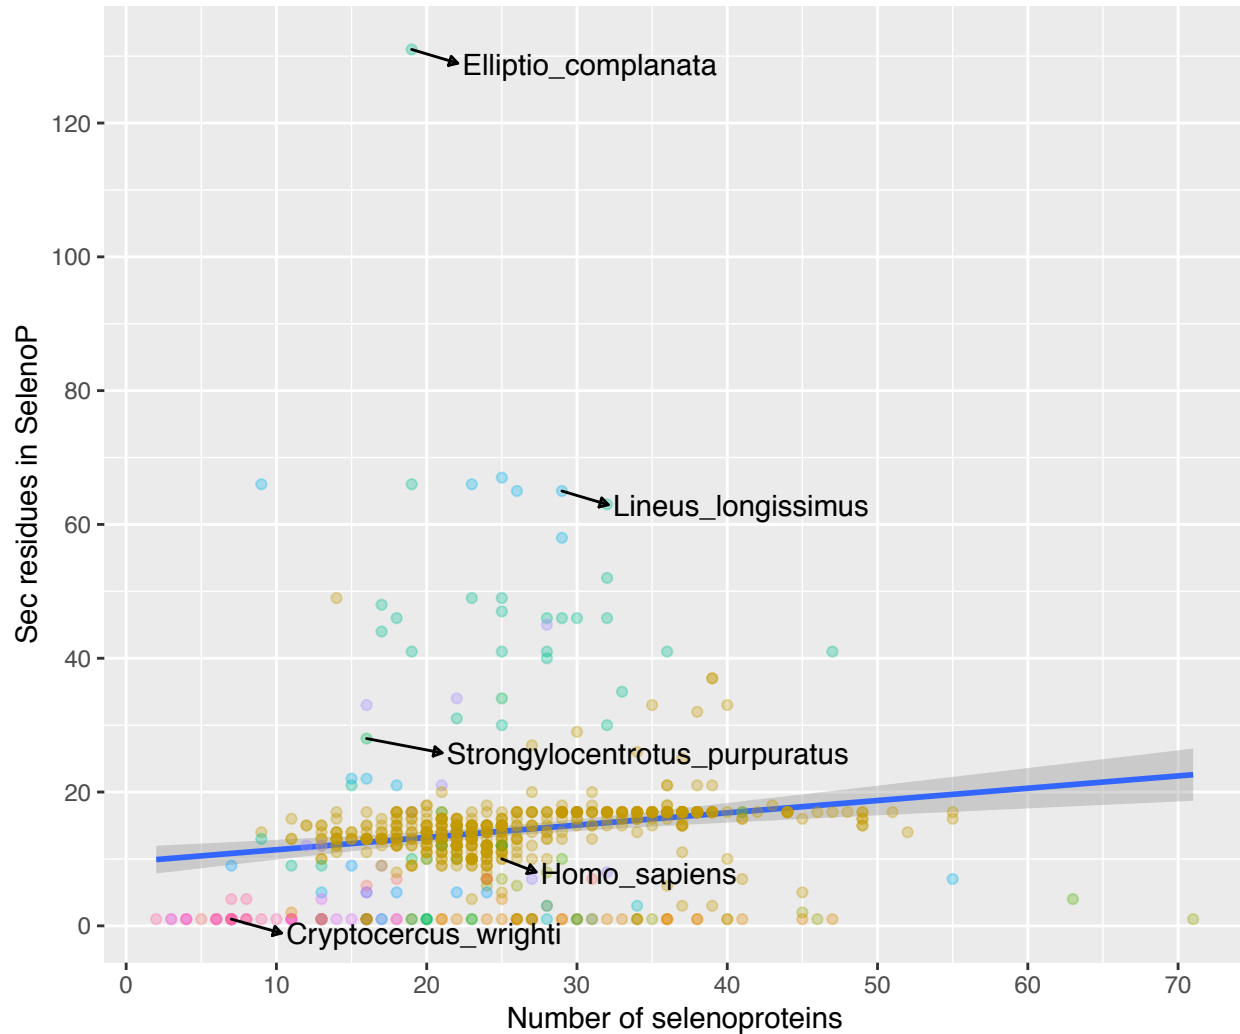

Supplement: NIHMS1537852-supplement-12.pdf [file NIHMS1537852-supplement-12.pdf]

**Figure S13**

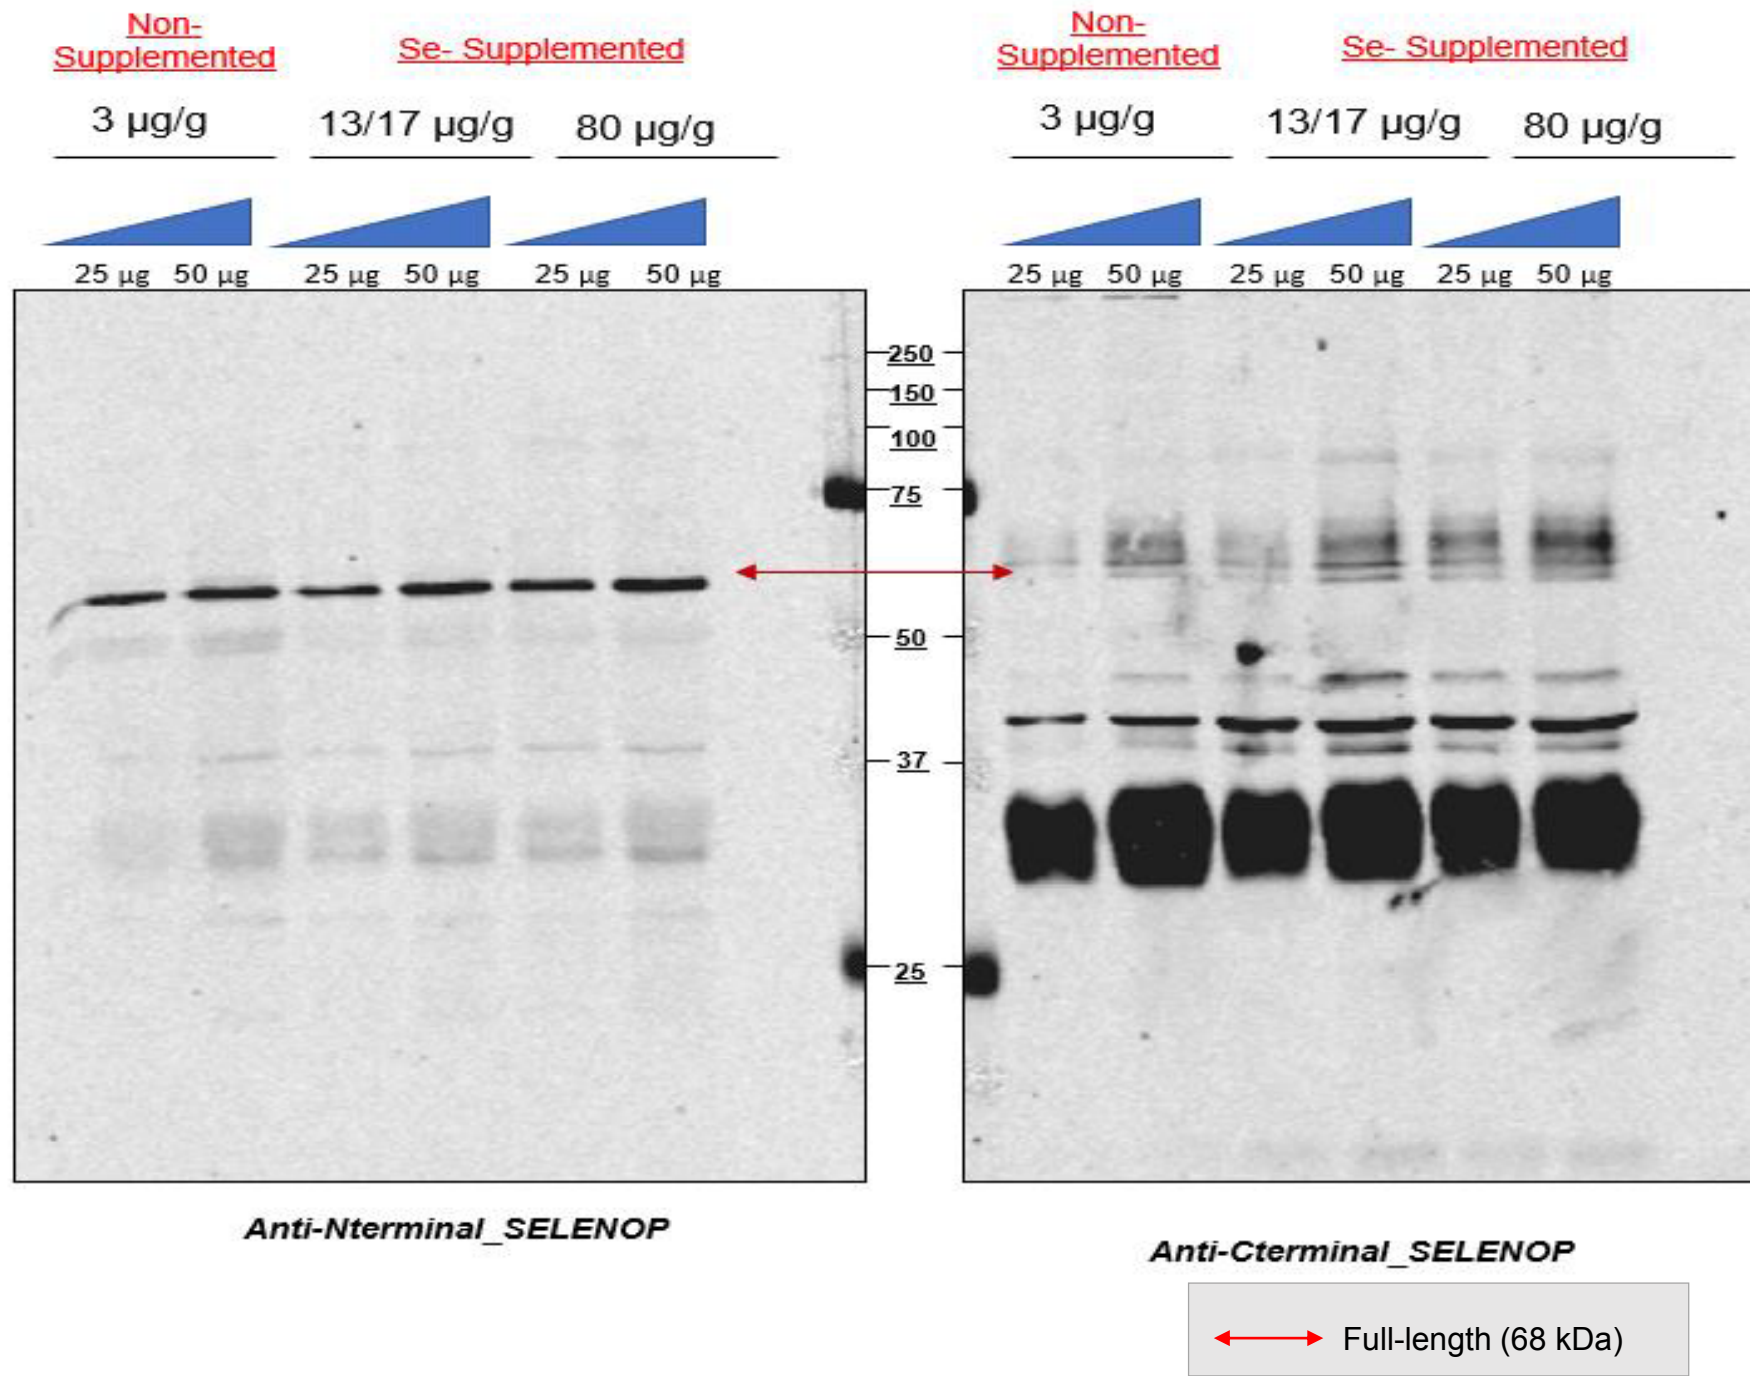

Supplement: NIHMS1537852-supplement-13.pdf [file NIHMS1537852-supplement-13.pdf]

**Figure S14**

UGA1  


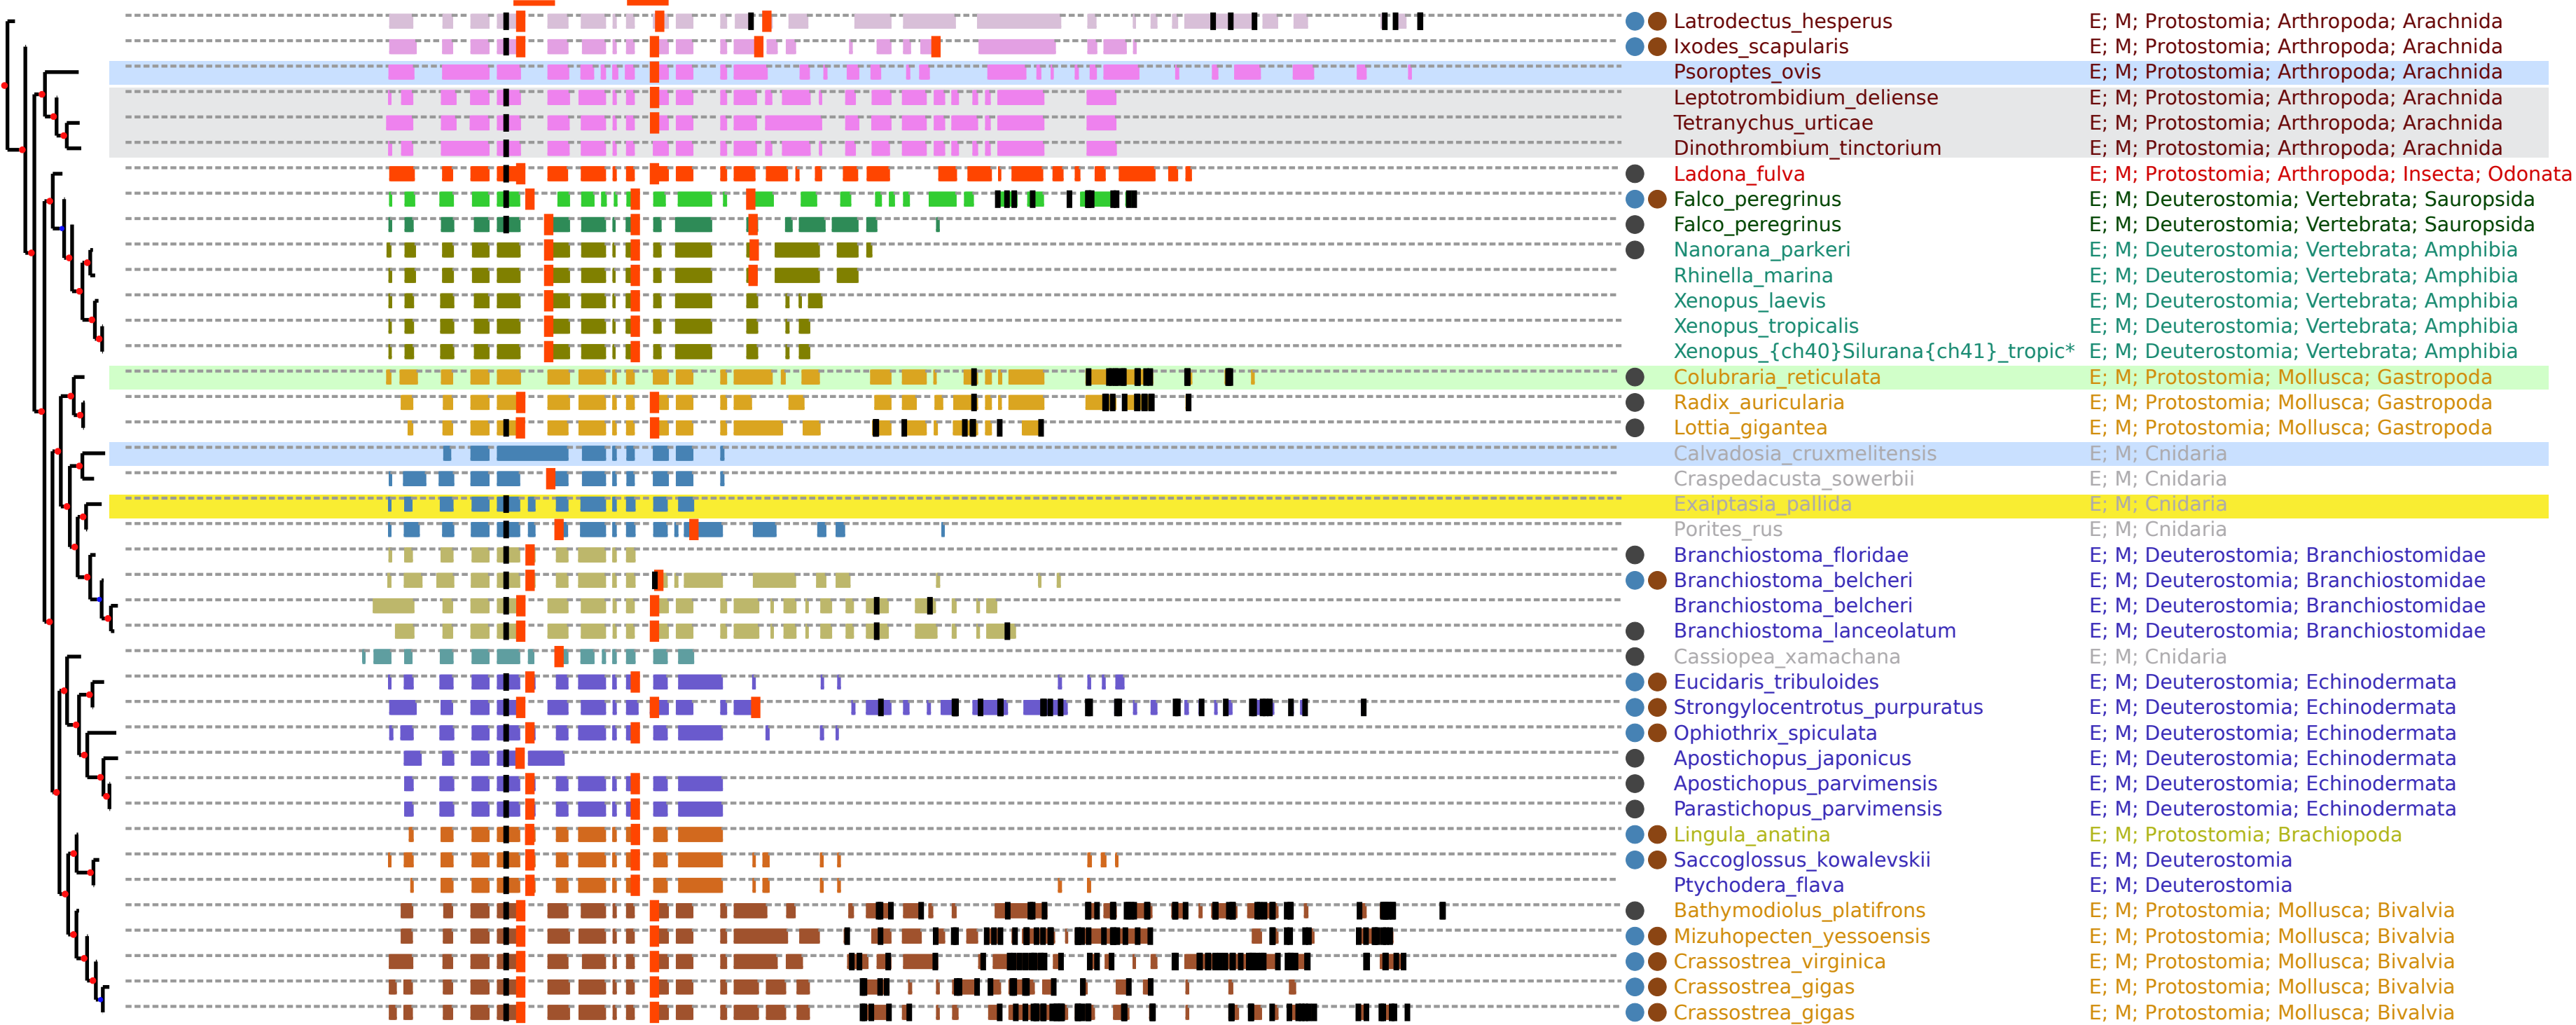

Supplement: NIHMS1537852-supplement-14.pdf [file NIHMS1537852-supplement-14.pdf]

# Figure S5

## A

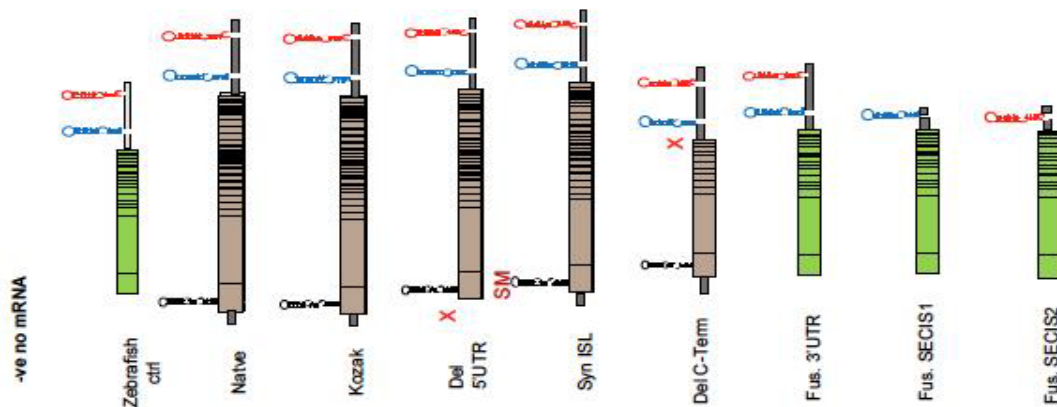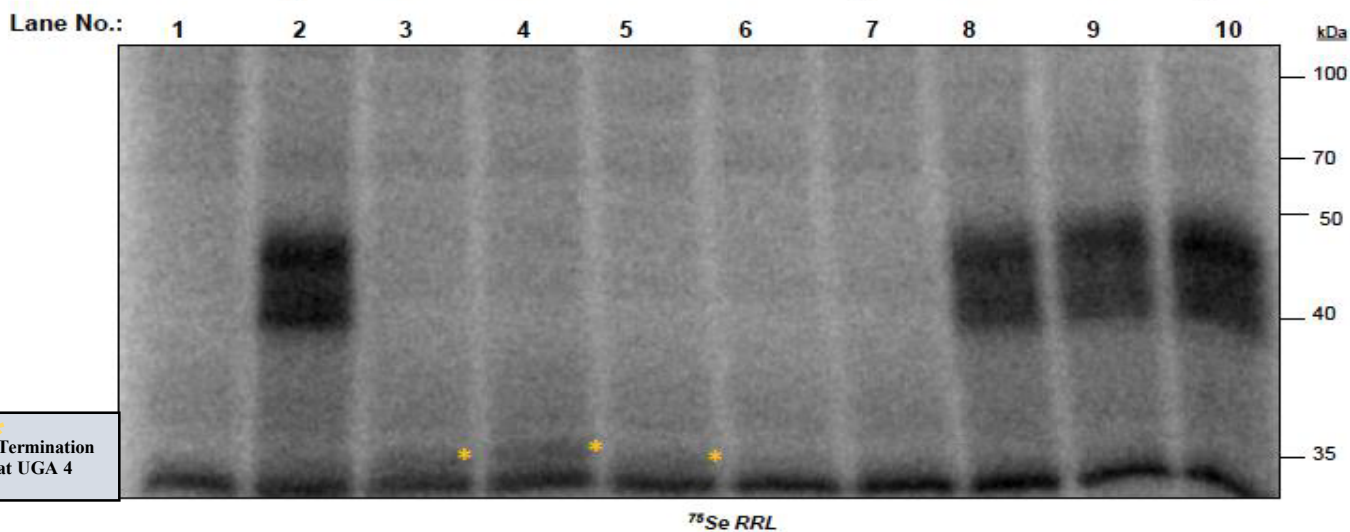

## B

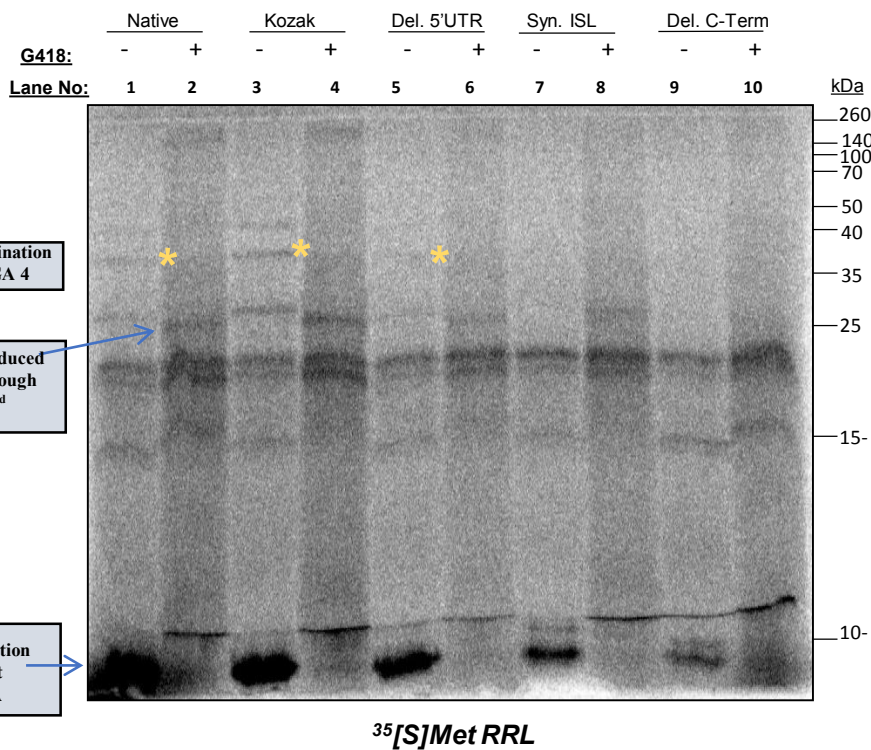

Supplement: NIHMS1537852-supplement-5.pdf [file NIHMS1537852-supplement-5.pdf]

# Figure S6

**A.**

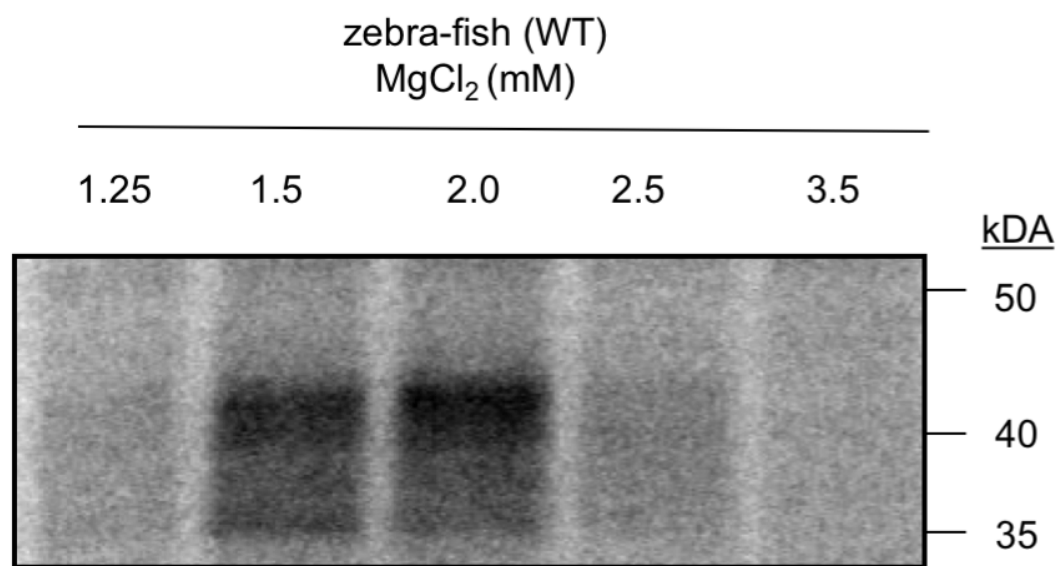

**B.**

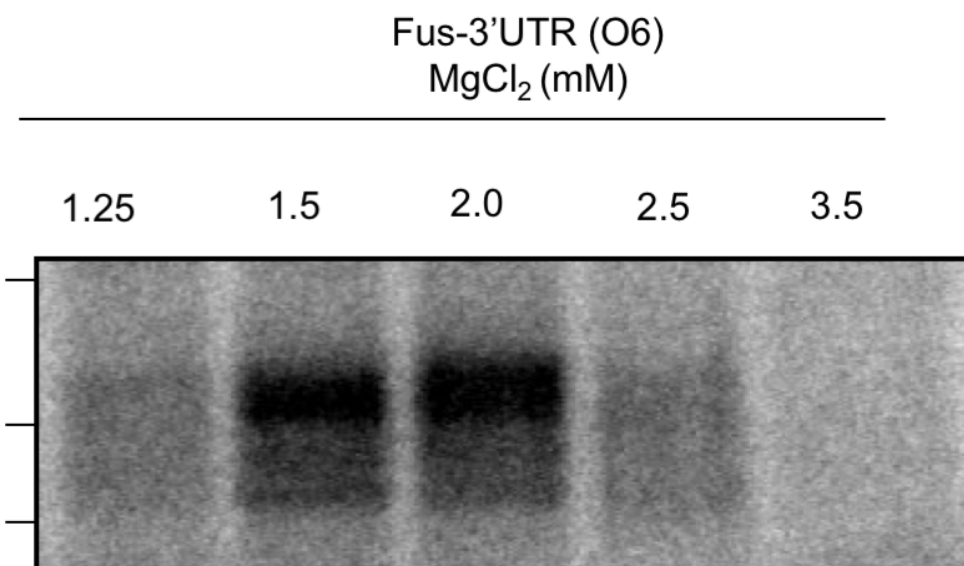

**C.**

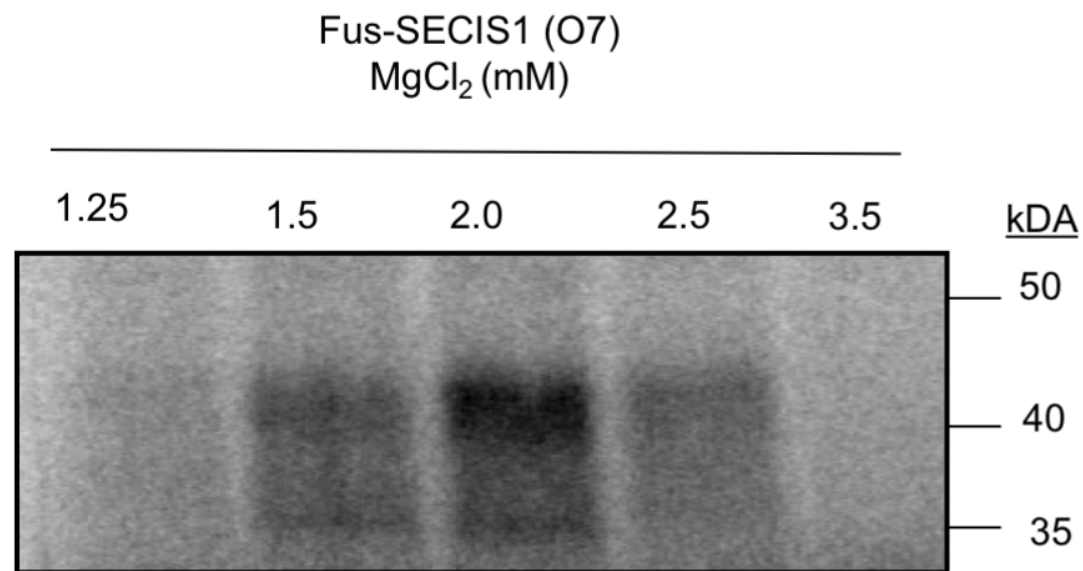

**D.**

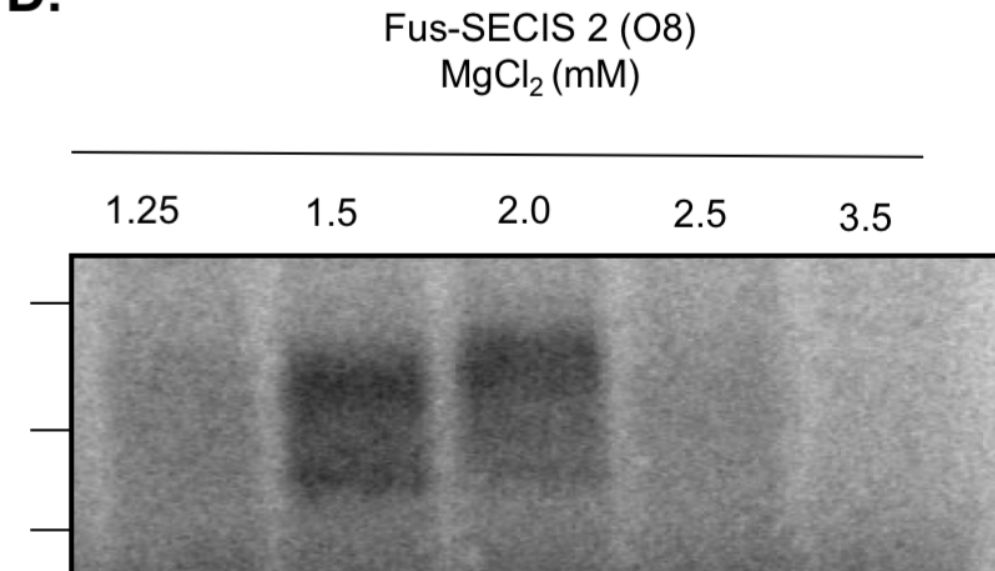

Supplement: NIHMS1537852-supplement-6.pdf [file NIHMS1537852-supplement-6.pdf]

# Figure S7

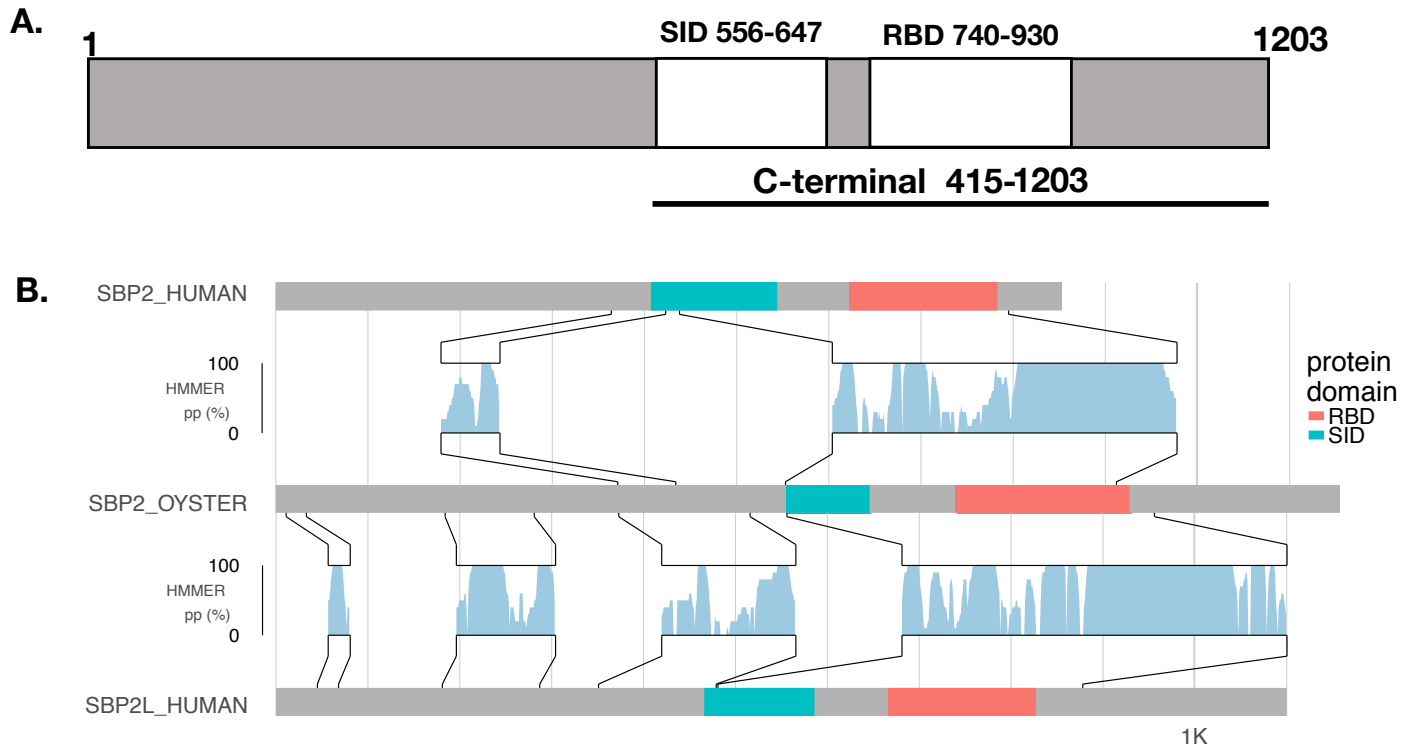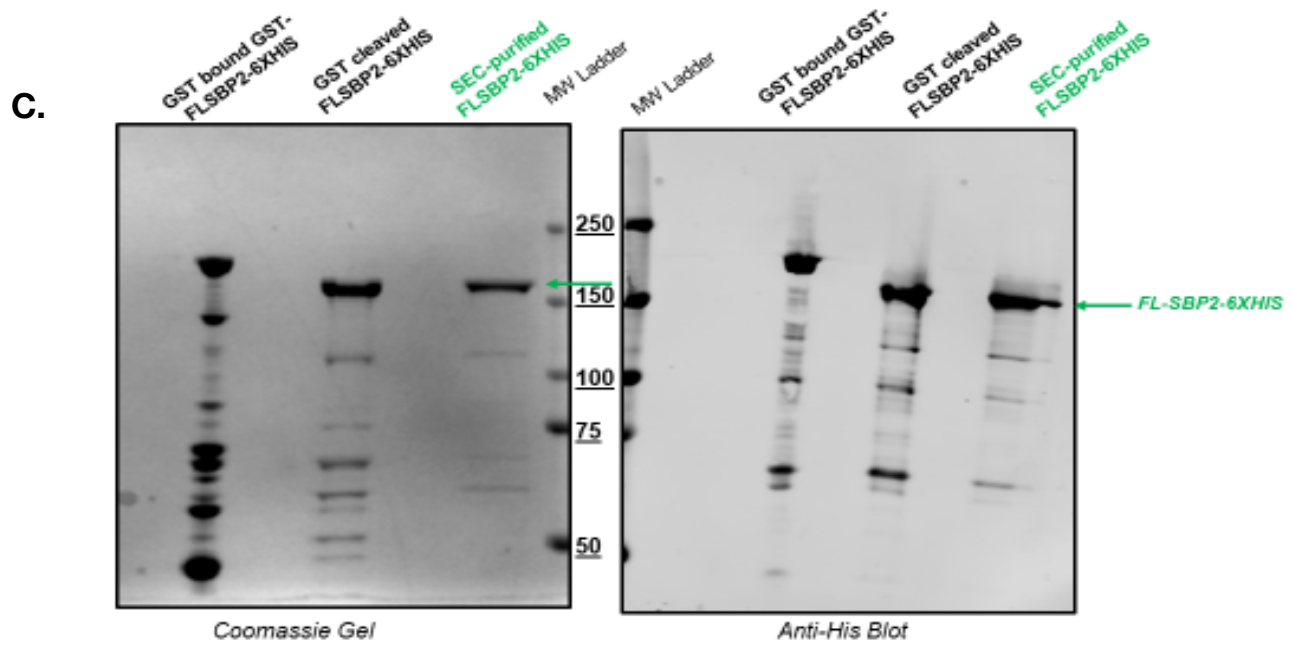

## Oyster SBP2 Reconstitution

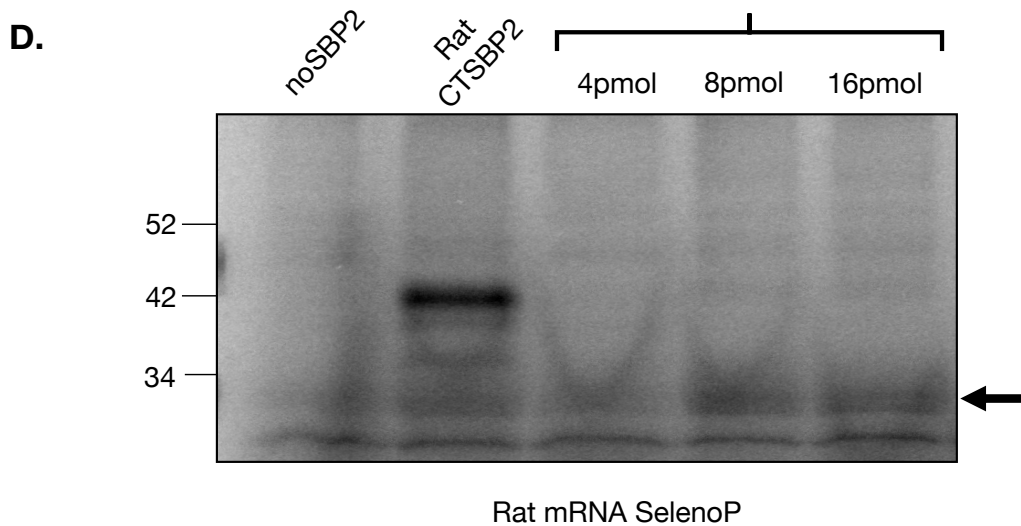

Supplement: NIHMS1537852-supplement-7.pdf [file NIHMS1537852-supplement-7.pdf]

**Figure S8**

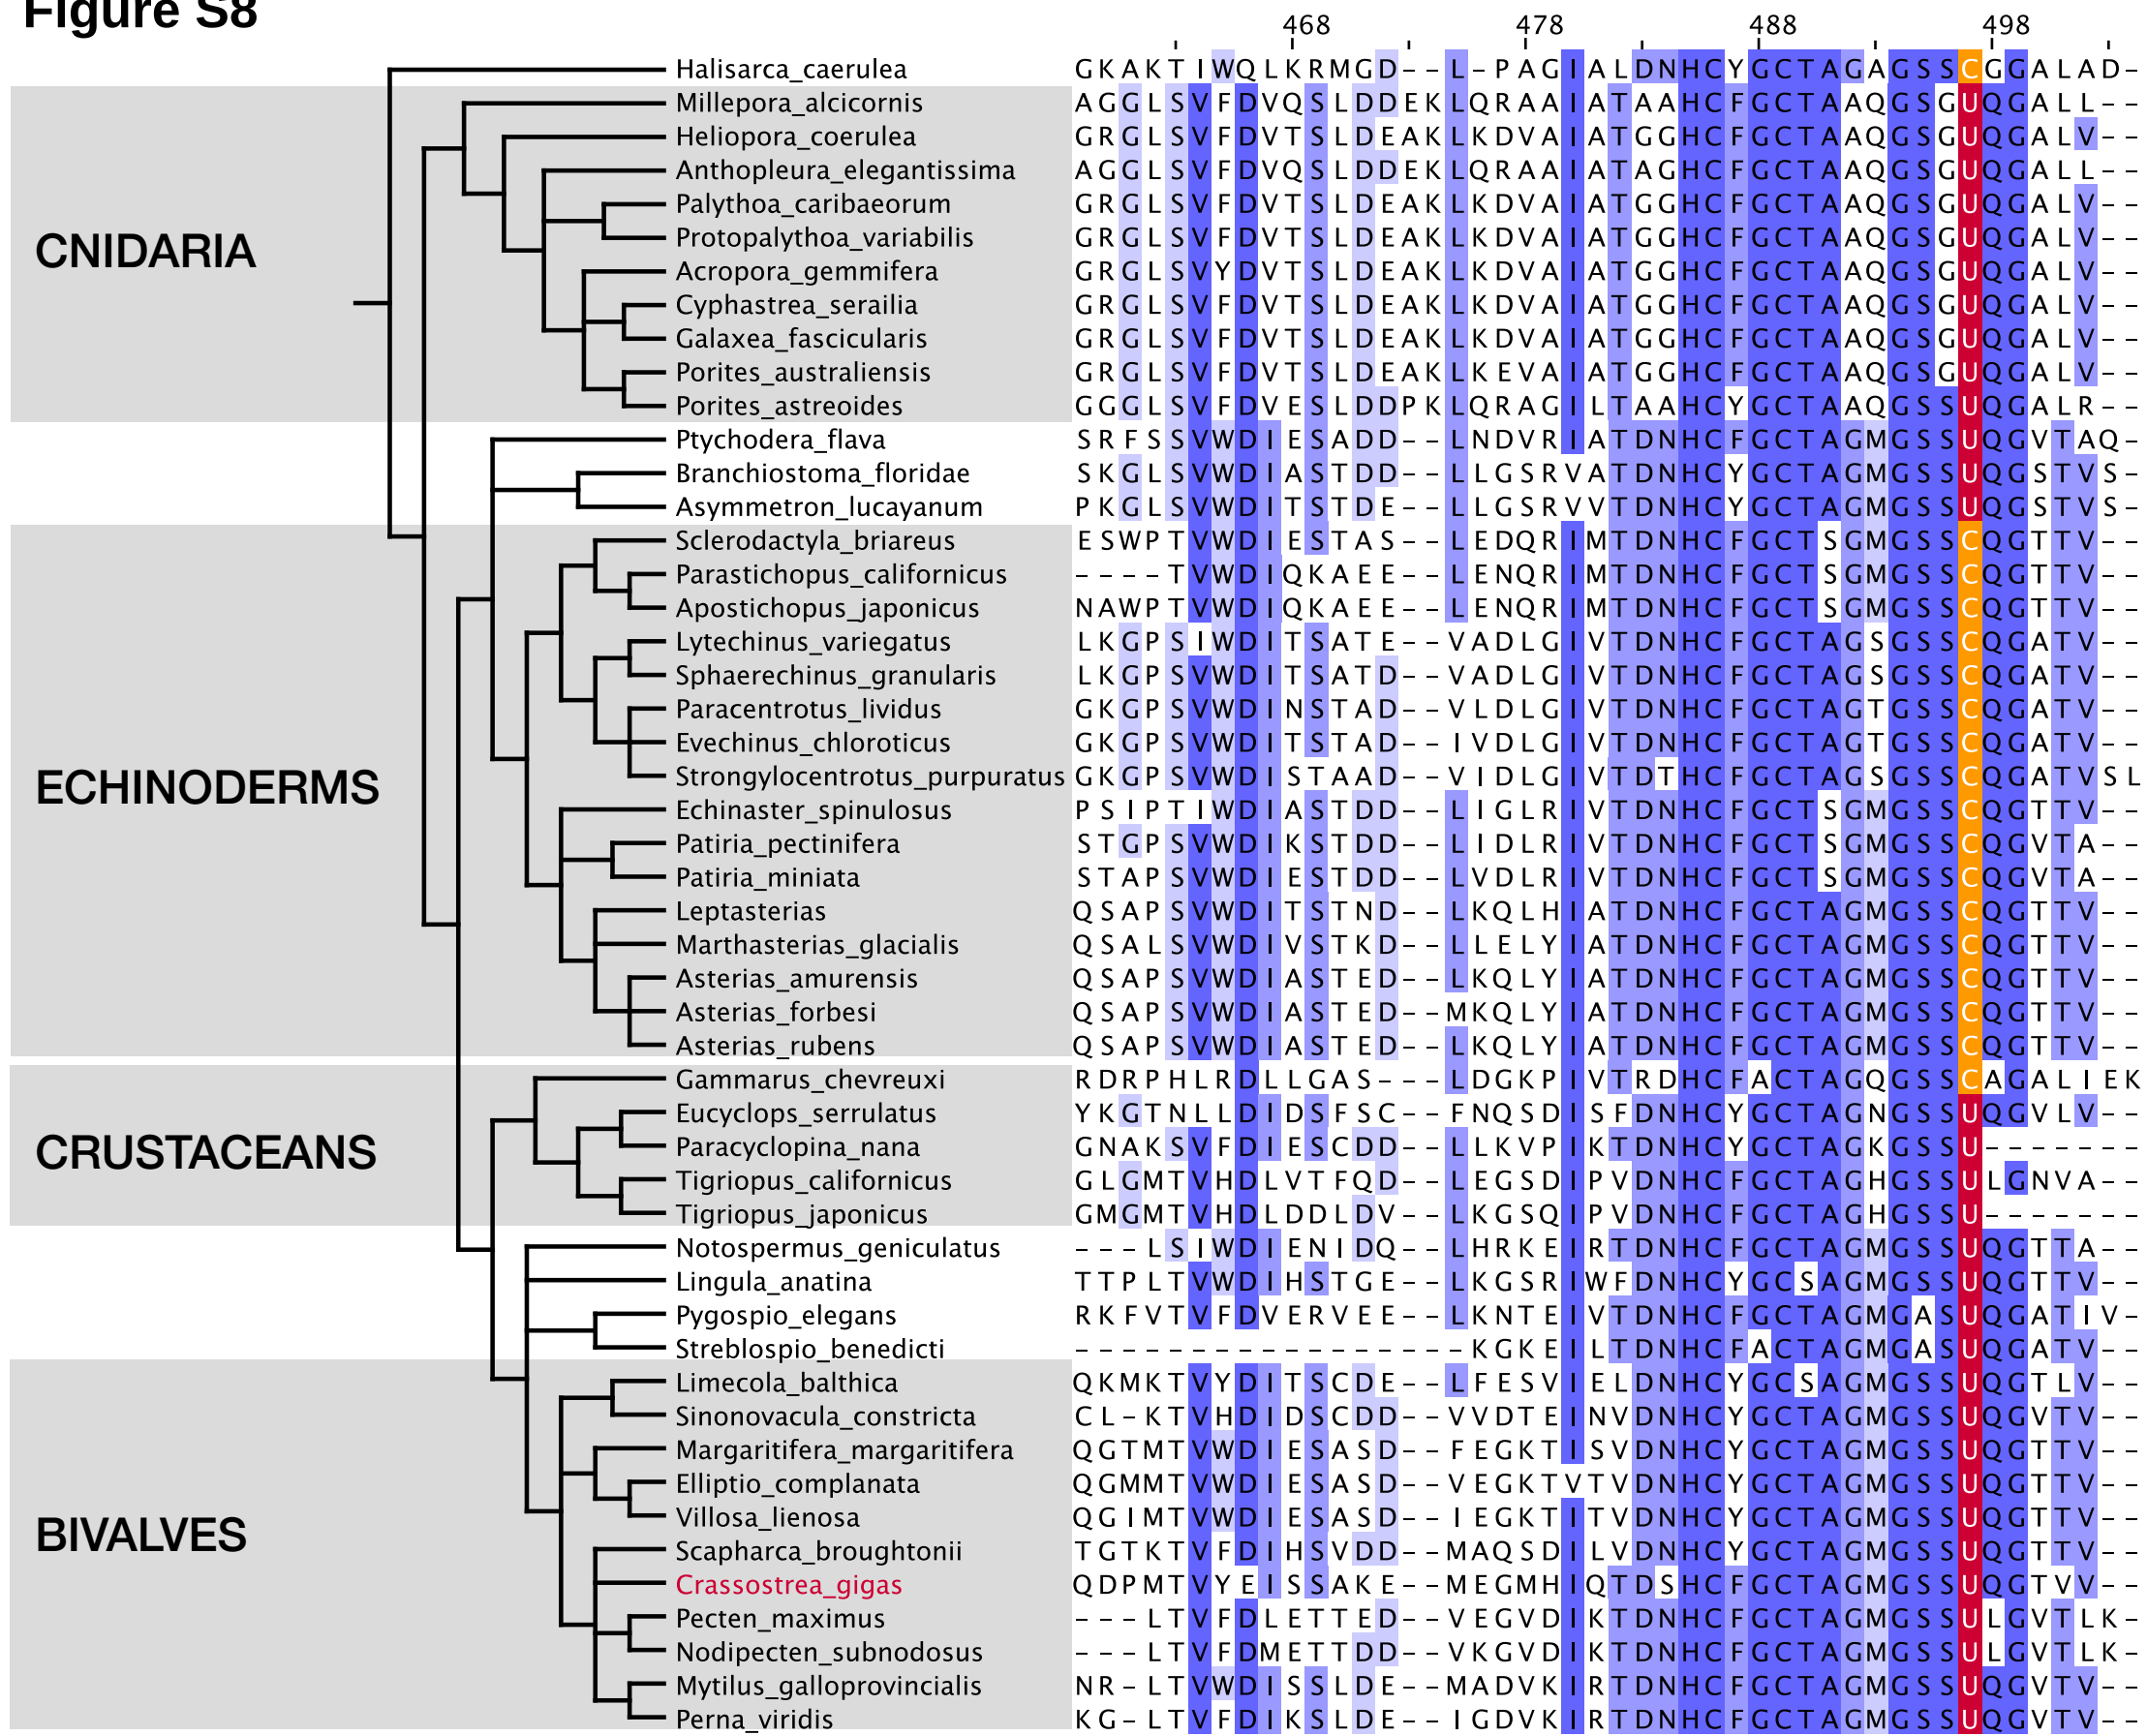

Supplement: NIHMS1537852-supplement-8.pdf [file NIHMS1537852-supplement-8.pdf]
